# Supplementary material for: Optimizing road safety: integrated analysis of motorized vehicle using lattice ordered complex linear diophantine fuzzy soft set
Source: PeerJ Comput Sci. 2024 Jul 23;10:e2165. doi: 10.7717/peerj-cs.2165 (PMC11323125; doi:10.7717/peerj-cs.2165)
Supplement: Supplemental Information 3 — The calculation of the comparative analysis of the second algorithm presented in the article. [file peerj-cs-10-2165-s003.xlsx]

## Sheet: Sheet1
COMPARATIVE STUDIES CALCULATIONS:-
ALGORITHM 6.3:
Matrix M =	0.6	0.7	0.3	0.2	0.7	0.7	0.3	0.3		0.7	0.8	0.2	0.2	0.7	0.8	0.3	0.2		0.8	0.9	0.2	0.1	0.8	0.8	0.1	0.1
	0.8	0.7	0.2	0.2	0.7	0.8	0.3	0.2		0.8	0.8	0.1	0.2	0.8	0.8	0.1	0.2		0.9	0.9	0.1	0.1	0.9	0.8	0.1	0.1
	0.6	0.9	0.2	0.1	0.7	0.8	0.3	0.1		0.8	0.9	0.1	0.1	0.8	0.9	0.2	0.1		0.9	0.9	0.1	0.1	0.8	0.9	0.2	0.1
	0.7	0.6	0.3	0.3	0.7	0.8	0.3	0.2		0.8	0.7	0.1	0.3	0.8	0.8	0.2	0.2		0.9	0.8	0.1	0.2	0.8	0.8	0.2	0.2
Matrix I =	0.5	0.6	0.4	0.3	0.6	0.6	0.4	0.4		0.6	0.7	0.3	0.3	0.6	0.7	0.4	0.3		0.7	0.8	0.3	0.2	0.7	0.7	0.2	0.2
	0.7	0.6	0.3	0.3	0.6	0.7	0.4	0.3		0.8	0.7	0.2	0.2	0.7	0.7	0.2	0.3		0.8	0.8	0.2	0.1	0.9	0.8	0.1	0.1
	0.7	0.8	0.3	0.2	0.6	0.7	0.4	0.2		0.8	0.8	0.2	0.2	0.7	0.8	0.3	0.2		0.9	0.9	0.1	0.1	0.8	0.8	0.2	0.2
	0.6	0.5	0.4	0.4	0.6	0.8	0.4	0.2		0.7	0.6	0.2	0.4	0.7	0.8	0.3	0.2		0.9	0.7	0.1	0.3	0.8	0.9	0.2	0.1
Matrix D=	0.8	0.6	0.2	0.4	0.6	0.5	0.4	0.4		0.8	0.6	0.2	0.4	0.6	0.6	0.4	0.4		0.8	0.7	0.2	0.3	0.6	0.6	0.3	0.3
	0.6	0.5	0.3	0.4	0.6	0.6	0.3	0.4		0.7	0.6	0.3	0.3	0.6	0.6	0.3	0.4		0.9	0.7	0.1	0.3	0.8	0.7	0.2	0.2
	0.6	0.7	0.4	0.3	0.5	0.6	0.4	0.3		0.7	0.7	0.3	0.3	0.6	0.7	0.4	0.3		0.8	0.8	0.2	0.2	0.7	0.7	0.3	0.3
	0.8	0.7	0.2	0.3	0.5	0.7	0.4	0.3		0.8	0.7	0.2	0.3	0.6	0.7	0.4	0.3		0.9	0.8	0.1	0.2	0.7	0.8	0.3	0.2
	0.27	0.45	0.6			0.09	0.27	0.4			0.6	0.6	0.6
Matrix S(M) =	0.6	0.63	0.8		Matrix S(I) =	0.4	0.6	0.6		Matrix S(D) =	0.27	0.4	0.8
	0.32	0.63	0.8			0.4	0.6	0.8			0.2	0.4	0.6
	0.4	0.63	0.8			0.2	0.45	0.8			0.6	0.6	0.8
	0.18	0.18	0.2				0.42	0.42	0.4		1.24
Matrix (S(M)-S(I)) =	0.2	0.03	0.2	Matrix S(D)-(S(M)-S(I))=Matrix U(M,I,D) =			0.07	0.37	0.6	Total Matrix =	1.04
	-0.08	0.03	0				0.28	0.37	0.6		1.25
	0.2	0.18	0				0.4	0.42	0.8		1.62
