# Supplementary material for: Optimizing road safety: integrated analysis of motorized vehicle using lattice ordered complex linear diophantine fuzzy soft set
Source: PeerJ Comput Sci. 2024 Jul 23;10:e2165. doi: 10.7717/peerj-cs.2165 (PMC11323125; doi:10.7717/peerj-cs.2165)
Supplement: Supplemental Information 4 — The comparative analysis of the first algorithm presented in the sixth section of the article with clear proof of the stability of the proposed methodology. [file peerj-cs-10-2165-s004.xlsx]

## Sheet: Sheet1
COMPARATIVE STUDIES CALCULATIONS:-
ALGORITHM 6.2:
Matrix M =	0.6	0.7	0.3	0.2	0.7	0.7	0.3	0.3		0.7	0.8	0.2	0.2	0.7	0.8	0.3	0.2		0.8	0.9	0.2	0.1	0.8	0.8	0.1	0.1
	0.8	0.7	0.2	0.2	0.7	0.8	0.3	0.2		0.8	0.8	0.1	0.2	0.8	0.8	0.1	0.2		0.9	0.9	0.1	0.1	0.9	0.8	0.1	0.1
	0.6	0.9	0.2	0.1	0.7	0.8	0.3	0.1		0.8	0.9	0.1	0.1	0.8	0.9	0.2	0.1		0.9	0.9	0.1	0.1	0.8	0.9	0.2	0.1
	0.7	0.6	0.3	0.3	0.7	0.8	0.3	0.2		0.8	0.7	0.1	0.3	0.8	0.8	0.2	0.2		0.9	0.8	0.1	0.2	0.8	0.8	0.2	0.2
Matrix I =	0.5	0.6	0.4	0.3	0.6	0.6	0.4	0.4		0.6	0.7	0.3	0.3	0.6	0.7	0.4	0.3		0.7	0.8	0.3	0.2	0.7	0.7	0.2	0.2
	0.7	0.6	0.3	0.3	0.6	0.7	0.4	0.3		0.8	0.7	0.2	0.2	0.7	0.7	0.2	0.3		0.8	0.8	0.2	0.1	0.9	0.8	0.1	0.1
	0.7	0.8	0.3	0.2	0.6	0.7	0.4	0.2		0.8	0.8	0.2	0.2	0.7	0.8	0.3	0.2		0.9	0.9	0.1	0.1	0.8	0.8	0.2	0.2
	0.6	0.5	0.4	0.4	0.6	0.8	0.4	0.2		0.7	0.6	0.2	0.4	0.7	0.8	0.3	0.2		0.9	0.7	0.1	0.3	0.8	0.9	0.2	0.1
Matrix D=	0.8	0.6	0.2	0.4	0.6	0.5	0.4	0.4		0.8	0.6	0.2	0.4	0.6	0.6	0.4	0.4		0.8	0.7	0.2	0.3	0.6	0.6	0.3	0.3
	0.6	0.5	0.3	0.4	0.6	0.6	0.3	0.4		0.7	0.6	0.3	0.3	0.6	0.6	0.3	0.4		0.9	0.7	0.1	0.3	0.8	0.7	0.2	0.2
	0.6	0.7	0.4	0.3	0.5	0.6	0.4	0.3		0.7	0.7	0.3	0.3	0.6	0.7	0.4	0.3		0.8	0.8	0.2	0.2	0.7	0.7	0.3	0.3
	0.8	0.7	0.2	0.3	0.5	0.7	0.4	0.3		0.8	0.7	0.2	0.3	0.6	0.7	0.4	0.3		0.9	0.8	0.1	0.2	0.7	0.8	0.3	0.2
Matrix (MxIxD)=	1.024
	1.432
	1.348
	1.513
